# Supplementary material for: A qualitative study on perceptions of surgical careers in Rwanda: A gender-based approach
Source: PubMed Central journal article supplement (PMC5944995; doi:10.1371/journal.pone.0197290), 2018-05-10
Supplement: pone.0197290.s001.pdf [file pone.0197290.s001.pdf]

**Table 1. Main themes**

| <b>Critical time points</b>                          | <b>Main Themes</b>                                |
|------------------------------------------------------|---------------------------------------------------|
| Developing <b>interest</b> in surgery as a specialty | Role models                                       |
|                                                      | Patient case encounters                           |
|                                                      | Exposure to surgery                               |
| <b>Selecting and sustaining</b> surgical careers     | Social expectations about roles within the family |
|                                                      | Physical and mental challenges                    |
|                                                      | Professional and personal support                 |
|                                                      | Finances                                          |
